# Supplementary material
Source: Copernicus journal article supplement (doi:10.5194/egusphere-2026-2323)
Supplement: Supplementary file 1 [file egusphere-2026-2323-supplement.pdf]

Supplement of

A workflow for the identification of earthquake sources from macroseismic data

Veronica Gironelli et al.

Correspondence to: Veronica Gironelli ([veronica.gironelli@ingv.it](mailto:veronica.gironelli@ingv.it))

**Table S1.** List of the 191 earthquakes included in the dataset of this study. In the header, "IDPset ID" indicates the preferred macroseismic field adopted by DBI15; "NIDPs Pref" is the number of intensity data points (IDPs) of the preferred dataset; "NIDPs Rev" is the number of IDPs after the pre-processing procedure; "Lat Pref" and "Lon Pref" are the epicentral coordinates derived from the preferred macroseismic field; "Lat Rev" and "Lon Rev" are the epicentral coordinates derived from the revised macroseismic field; "Lat Instr" and "Lon Instr" are the available instrumental epicentral locations from CPTI15; "Dist\_1 [km]" is the location shifts between the preferred and revised epicentral coordinates; "Dist\_2 [km]" is the location shifts between the preferred and instrumental epicentral coordinates; "Dist\_3 [km]" is the location shifts between the revised and instrumental epicentral coordinates; "Mw Pref" is the magnitude estimate derived from the preferred field; "Mw Rev" is the magnitude estimate derived from the revised field; "Mw Instr" is the instrumental magnitude; "ΔMw\_1" is the magnitude difference between preferred and revised estimates; "ΔMw\_2" is the magnitude difference between preferred and instrumental magnitudes; "ΔMw\_3" is the magnitude difference between revised and instrumental magnitudes.

| ID | Event date         | Event name (CPTI15)          | Event ID (CPTI15) | IDPset ID | NIDPs Pref | NIDPs Rev | Lat Pref | Lon Pref | Lat Rev | Lon Rev | Lat Instr | Lon Instr | Dist_1 [km] | Dist_2 [km] | Dist_3 [km] | Mw Pref | Mw Rev | Mw Instr | ΔMw_1 | ΔMw_2 | ΔMw_3 |
|----|--------------------|------------------------------|-------------------|-----------|------------|-----------|----------|----------|---------|---------|-----------|-----------|-------------|-------------|-------------|---------|--------|----------|-------|-------|-------|
| 1  | January 03, 1117   | Veronese                     | 11170103_1515_000 | CFTI4med  | 55         | 33        | 45.267   | 11.015   | 45.338  | 11.109  |           |           | 10.8        |             |             | 6.52    | 6.37   |          | 0.15  |       |       |
| 2  | March 25, 1120     | Valle del Garigliano         | 11200325_0000_000 | CFTI4med  | 4          | 4         | 41.377   | 13.917   | 41.377  | 13.917  |           |           | 0           |             |             | 5.8     | 5.8    |          | 0     |       |       |
| 3  | February 04, 1169  | Sicilia sud-orientale        | 11690204_0700_000 | CFTI4med  | 8          | 5         | 37.215   | 14.949   | 37.285  | 14.999  |           |           | 9           |             |             | 6.5     | 6.03   |          | 0.47  |       |       |
| 4  | May 24, 1184       | Valle del Crati              | 11840524_0000_000 | CFTI4med  | 6          | 6         | 39.395   | 16.194   | 39.395  | 16.194  |           |           | 0           |             |             | 6.75    | 6.75   |          | 0     |       |       |
| 5  | December 25, 1222  | Bresciano-Veronese           | 12221225_1230_000 | CFTI4med  | 18         | 9         | 45.312   | 10.699   | 45.299  | 11.09   |           |           | 30.6        |             |             | 5.68    | 5.62   |          | 0.06  |       |       |
| 6  | April 30, 1279     | Appennino umbro-marchigiano  | 12790430_0000_000 | MONA987   | 17         | 14        | 44.13    | 11.919   | 44.13   | 11.919  |           |           | 0           |             |             | 5.52    | 5.52   |          | 0     |       |       |
| 7  | April 30, 1279     | Appennino forlivese          | 12790430_1800_000 | POST990   | 5          | 5         | 43.093   | 12.872   | 43.198  | 12.955  |           |           | 13.5        |             |             | 6.2     | 6.05   |          | 0.15  |       |       |
| 8  | September 04, 1293 | Sannio-Matese                | 12930904_0000_000 | CFTI4med  | 6          | 4         | 41.304   | 14.548   | 41.188  | 14.368  |           |           | 19.8        |             |             | 5.8     | 5.33   |          | 0.47  |       |       |
| 9  | December 01, 1298  | Monti Reatini                | 12981201_0000_000 | CFTI4med  | 5          | 4         | 42.576   | 12.903   | 42.546  | 12.828  |           |           | 6.9         |             |             | 6.26    | 5.8    |          | 0.46  |       |       |
| 10 | December 03, 1315  | Aquilano                     | 13151203_0000_000 | CFTI4med  | 4          | 2         | 42.351   | 13.399   | 42.351  | 13.399  |           |           | 0           |             |             | 5.56    | 5.56   |          | 0     |       |       |
| 11 | December 01, 1328  | Valnerina                    | 13281201_0000_000 | MONA987   | 13         | 12        | 42.857   | 13.018   | 42.857  | 13.018  |           |           | 0           |             |             | 6.49    | 6.51   |          | -0.02 |       |       |
| 12 | September 09, 1349 | Appennino laziale-abruzzese  | 13490909_0000_000 | CFTI4med  | 17         | 16        | 42.27    | 13.118   | 42.266  | 13.109  |           |           | 0.9         |             |             | 6.27    | 6.25   |          | 0.02  |       |       |
| 13 | September 09, 1349 | Lazio-Molise                 | 13490909_0815_001 | GALNA009  | 24         | 20        | 41.554   | 13.942   | 41.57   | 13.907  |           |           | 3.5         |             |             | 6.8     | 6.7    |          | 0.1   |       |       |
| 14 | December 25, 1352  | Alta Valtiberina             | 13521225_0000_000 | CASAL996  | 7          | 7         | 43.469   | 12.127   | 43.469  | 12.127  |           |           | 0           |             |             | 6.31    | 6.31   |          | 0     |       |       |
| 15 | October 18, 1389   | Alta Valtiberina             | 13891018_0000_000 | CASAL996  | 9          | 9         | 43.527   | 12.299   | 43.527  | 12.299  |           |           | 0           |             |             | 6.03    | 6.03   |          | 0     |       |       |
| 16 | August 07, 1414    | Colline Metallifere          | 14140807_0000_001 | CASAL996  | 8          | 8         | 43.27    | 11.121   | 43.27   | 11.121  |           |           | 0           |             |             | 5.7     | 5.7    |          | 0     |       |       |
| 17 | June 11, 1438      | Parmense                     | 14380611_0200_000 | CFTI4med  | 4          | 4         | 44.844   | 10.239   | 44.844  | 10.239  |           |           | 0           |             |             | 5.56    | 5.56   |          | 0     |       |       |
| 18 | December 05, 1456  | Appennino centro-meridionale | 14561205_0000_000 | MELAL988  | 199        | 173       | 41.302   | 14.711   | 41.317  | 14.728  |           |           | 2.2         |             |             | 7.19    | 6.85   |          | 0.34  |       |       |
| 19 | April 26, 1458     | Alta Valtiberina             | 14580426_1215_000 | CFTI4med  | 5          | 5         | 43.463   | 12.236   | 43.463  | 12.236  |           |           | 0           |             |             | 5.8     | 5.8    |          | 0     |       |       |
| 20 | November 27, 1461  | Aquilano                     | 14611127_2105_000 | TERAL009  | 8          | 8         | 42.308   | 13.544   | 42.308  | 13.544  |           |           | 0           |             |             | 6.5     | 6.5    |          | 0     |       |       |
| 21 | January 15, 1466   | Irpinia-Basilicata           | 14660115_0225_000 | CFTI4med  | 31         | 31        | 40.765   | 15.334   | 40.765  | 15.334  |           |           | 0           |             |             | 5.98    | 5.98   |          | 0     |       |       |
| 22 | May 07, 1481       | Lunigiana                    | 14810507_1415_000 | CFTI4med  | 6          | 6         | 44.274   | 10.13    | 44.274  | 10.13   |           |           | 0           |             |             | 5.6     | 5.6    |          | 0     |       |       |
| 23 | August 11, 1483    | Romagna                      | 14830811_1940_000 | CFTI4med  | 14         | 14        | 44.155   | 12.23    | 44.155  | 12.23   |           |           | 0           |             |             | 5.69    | 5.69   |          | 0     |       |       |
| 24 | June 05, 1501      | Modenese                     | 15010605_1000_000 | CFTI4med  | 17         | 15        | 44.519   | 10.844   | 44.519  | 10.844  |           |           | 0           |             |             | 6.05    | 6.05   |          | 0     |       |       |
| 25 | January 03, 1505   | Bolognese                    | 15050103_0200_000 | CFTI4med  | 31         | 31        | 44.507   | 11.23    | 44.507  | 11.23   |           |           | 0           |             |             | 5.62    | 5.62   |          | 0     |       |       |
| 26 | February 25, 1509  | Stretto di Messina           | 15090225_2220_000 | CFTI4med  | 4          | 4         | 38.1     | 15.684   | 38.1    | 15.684  |           |           | 0           |             |             | 5.56    | 5.56   |          | 0     |       |       |
| 27 | March 26, 1511     | Friuli-Slovenia              | 15110326_1440_000 | CAMAL011c | 120        | 97        | 46.209   | 13.216   | 46.209  | 13.216  |           |           | 0           |             |             | 6.32    | 6.23   |          | 0.09  |       |       |
| 28 | June 13, 1542      | Mugello                      | 15420613_0215_000 | CFTI4med  | 46         | 45        | 44.006   | 11.385   | 44.006  | 11.385  |           |           | 0           |             |             | 6.02    | 6.02   |          | 0     |       |       |
| 29 | December 10, 1542  | Sicilia sud-orientale        | 15421210_1515_000 | CFTI4med  | 32         | 28        | 37.215   | 14.944   | 37.146  | 14.886  |           |           | 9.2         |             |             | 6.68    | 6.27   |          | 0.41  |       |       |
| 30 | April 13, 1558     | Valdarno superiore           | 15580413_0000_000 | CAMAL011b | 29         | 22        | 43.457   | 11.564   | 43.457  | 11.564  |           |           | 0           |             |             | 5.98    | 5.98   |          | 0     |       |       |
| 31 | May 11, 1560       | Costa pugliese centrale      | 15600511_0440_000 | CFTI4med  | 7          | 7         | 41.249   | 16.485   | 41.249  | 16.485  |           |           | 0           |             |             | 5.66    | 5.66   |          | 0     |       |       |
| 32 | July 31, 1561      | Vallo di Diano               | 15610731_1945_000 | CASAL008  | 22         | 20        | 40.65    | 15.389   | 40.627  | 15.42   |           |           | 3.6         |             |             | 6.34    | 6.31   |          | 0.03  |       |       |
| 33 | July 31, 1561      | Penisola sorrentina          | 15610731_2010_000 | CASAL008  | 5          | 5         | 40.685   | 14.718   | 40.685  | 14.718  |           |           | 0           |             |             | 5.56    | 5.56   |          | 0     |       |       |
| 34 | August 19, 1561    | Vallo di Diano               | 15610819_1550_000 | CASAL008  | 32         | 31        | 40.563   | 15.505   | 40.557  | 15.449  |           |           | 4.8         |             |             | 6.72    | 6.73   |          | -0.01 |       |       |
| 35 | September 10, 1584 | Appennino forlivese          | 15840910_2030_000 | CFTI4med  | 17         | 17        | 43.862   | 11.992   | 43.862  | 11.992  |           |           | 0           |             |             | 5.97    | 5.97   |          | 0     |       |       |
| 36 | November 06, 1599  | Valnerina                    | 15991106_0125_000 | CFTI4med  | 20         | 19        | 42.724   | 13.021   | 42.724  | 13.021  |           |           | 0           |             |             | 6.07    | 6.08   |          | -0.01 |       |       |
| 37 | July 20, 1609      | Calabria centrale            | 16090720_0000_000 | SCIAL006  | 5          | 5         | 38.925   | 16.373   | 38.925  | 16.373  |           |           | 0           |             |             | 5.8     | 5.8    |          | 0     |       |       |
| 38 | October 03, 1624   | Monti Iblei settentrionali   | 16241003_1700_000 | CFTI4med  | 3          | 3         | 37.27    | 14.742   | 37.27   | 14.742  |           |           | 0           |             |             | 5.56    | 5.56   |          | 0     |       |       |
| 39 | April 04, 1626     | Calabria centrale            | 16260404_1245_000 | CFTI4med  | 7          | 6         | 38.851   | 16.456   | 38.88   | 16.486  |           |           | 4.2         |             |             | 6.07    | 5.78   |          | 0.29  |       |       |
| 40 | July 30, 1627      | Capitanata                   | 16270730_1050_000 | CFTI4med  | 64         | 60        | 41.737   | 15.342   | 41.737  | 15.342  |           |           | 0           |             |             | 6.66    | 6.65   |          | 0.01  |       |       |
| 41 | August 07, 1627    | Capitanata                   | 16270807_1640_000 | CFTI4med  | 5          | 5         | 41.758   | 15.328   | 41.758  | 15.328  |           |           | 0           |             |             | 6.03    | 6.03   |          | 0     |       |       |
| 42 | March 27, 1638     | Calabria centrale            | 16380327_1505_000 | CFTI4med  | 213        | 204       | 39.048   | 16.289   | 39.068  | 16.298  |           |           | 2.4         |             |             | 7.09    | 7.11   |          | -0.02 |       |       |
| 43 | June 08, 1638      | Crotonese                    | 16380608_0945_000 | CFTI4med  | 41         | 41        | 39.279   | 16.812   | 39.279  | 16.812  |           |           | 0           |             |             | 6.76    | 6.76   |          | 0     |       |       |
| 44 | October 07, 1639   | Monti della Laga             | 16391007_0000_000 | CAST003b  | 39         | 30        | 42.639   | 13.261   | 42.639  | 13.261  |           |           | 0           |             |             | 6.21    | 6.21   |          | 0     |       |       |
| 45 | June 19, 1640      | Calabria centrale            | 16400619_0000_000 | CAMAL011b | 3          | 3         | 38.632   | 16.491   | 38.632  | 16.491  |           |           | 0           |             |             | 5.8     | 5.8    |          | 0     |       |       |
| 46 | April 28, 1646     | Monti della Laga             | 16460428_0700_000 | CAMAL011b | 10         | 9         | 42.615   | 13.247   | 42.615  | 13.247  |           |           | 0           |             |             | 5.9     | 5.9    |          | 0     |       |       |
| 47 | May 31, 1646       | Gargano                      | 16460531_0000_000 | CAMAL008  | 35         | 20        | 41.905   | 15.993   | 41.927  | 15.932  |           |           | 5.6         |             |             | 6.72    | 6.71   |          | 0.01  |       |       |
| 48 | May 05, 1647       | Gargano                      | 16470505_0000_000 | CAMAL011b | 5          | 4         | 41.732   | 15.558   | 41.676  | 15.459  |           |           | 10.4        |             |             | 5.69    | 4.86   |          | 0.83  |       |       |
| 49 | July 24, 1654      | Sorano                       | 16540724_0025_000 | CFTI4med  | 44         | 41        | 41.635   | 13.683   | 41.629  | 13.675  |           |           | 0.9         |             |             | 6.33    | 6.34   |          | -0.01 |       |       |
| 50 | January 29, 1657   | Capitanata                   | 16570129_0000_000 | CAMAL011b | 12         | 10        | 41.726   | 15.393   | 41.719  | 15.372  |           |           | 1.9         |             |             | 5.97    | 5.96   |          | 0     |       |       |
| 51 | November 05, 1659  | Calabria centrale            | 16591105_2215_000 | CFTI4med  | 126        | 124       | 38.694   | 16.249   | 38.698  | 16.233  |           |           | 1.5         |             |             | 6.57    | 6.58   |          | -0.01 |       |       |
| 52 | March 22, 1661     | Appennino forlivese          | 16610322_1250_000 | CFTI4med  | 79         | 76        | 44.021   | 11.898   | 44.047  | 11.896  |           |           | 2.9         |             |             | 6.05    | 6.1    |          | -0.05 |       |       |
| 53 | April 14, 1672     | Riminese                     | 16720414_1545_000 | CFTI4med  | 92         | 91        | 43.941   | 12.576   | 43.941  | 12.576  |           |           | 0           |             |             | 5.59    | 5.62   |          | -0.03 |       |       |
| 54 | April 11, 1688     | Romagna                      | 16880411_1220_000 | CFTI4med  | 39         | 39        | 44.39    | 11.942   | 44.39   | 11.942  |           |           | 0           |             |             | 5.84    | 5.84   |          | 0     |       |       |
| 55 | June 05, 1688      | Sannio                       | 16880605_1530_000 | CFTI4med  | 215        | 166       | 41.283   | 14.561   | 41.283  | 14.561  |           |           | 0           |             |             | 7.06    | 7.07   |          | -0.01 |       |       |
| 56 | December 23, 1690  | Costa anconetana             | 16901223_0020_000 | CFTI4med  | 16         | 15        | 43.551   | 13.594   | 43.551  | 13.594  |           |           | 0           |             |             | 5.58    | 5.58   |          | 0     |       |       |
| 57 | March 04, 1692     | Irpinia                      | 16920304_2220_000 | CAMAL011b | 9          | 9         | 40.903   | 15.196   | 40.903  | 15.196  |           |           | 0           |             |             | 5.88    | 5.88   |          | 0     |       |       |
| 58 | January 09, 1693   | Sicilia sud-orientale        | 16930109_2100_000 | CFTI4med  | 30         | 29        | 37.141   | 15.035   | 37.173  | 15.061  |           |           | 4.3         |             |             | 6.07    | 6.04   |          | 0.03  |       |       |
| 59 | January 11, 1693   | Sicilia sud-orientale        | 16930111_1330_000 | CFTI4med  | 179        | 144       | 37.14    | 15.013   | 37.126  | 15.048  |           |           | 3.5         |             |             | 7.32    | 7.33   |          | -0.01 |       |       |
| 60 | September 08, 1694 | Irpinia-Basilicata           | 16940908_1140_000 | CFTI4med  | 251        | 245       | 40.862   | 15.406   | 40.835  | 15.437  |           |           | 4           |             |             | 6.73    | 6.73   |          | 0     |       |       |
| 61 | February 25, 1695  | Asolano                      | 16950225_0530_000 | CAMAL012  | 107        | 105       | 45.861   | 11.91    | 45.861  | 11.91   |           |           | 0           |             |             | 6.4     | 6.39   |          | 0.01  |       |       |
| 62 | June 11, 1695      | Lazio settentrionale         | 16950611_0220_000 | ENEL995   | 50         | 49        | 42.613   | 12.11    | 42.613  | 12.11   |           |           | 0           |             |             | 5.8     | 5.81   |          | -0.01 |       |       |
| 63 | January 01, 1698   | Monti Iblei settentrionali   | 16980101_0000_000 | BARAL001  | 6          | 6         | 37.292   | 14.789   | 37.292  | 14.789  |           |           | 0           |             |             |         |        |          |       |       |       |

|     |                    |                             |                   |           |      |      |        |        |        |        |  |  |      |  |      |      |       |  |  |
|-----|--------------------|-----------------------------|-------------------|-----------|------|------|--------|--------|--------|--------|--|--|------|--|------|------|-------|--|--|
| 94  | December 25, 1786  | Riminese                    | 17861225_0100_000 | CFTI4med  | 90   | 90   | 43.991 | 12.565 | 43.991 | 12.565 |  |  |      |  | 5.66 | 5.66 | 0     |  |  |
| 95  | September 30, 1789 | Alta Valtiberina            | 17890930_1000_000 | CAST002   | 73   | 66   | 43.51  | 12.217 | 43.51  | 12.217 |  |  |      |  | 5.89 | 5.89 | 0     |  |  |
| 96  | October 11, 1791   | Appennino umbro-marchigiano | 17911011_1305_000 | CFTI4med  | 54   | 53   | 42.95  | 12.861 | 42.95  | 12.861 |  |  |      |  | 5.57 | 5.57 | 0     |  |  |
| 97  | October 13, 1791   | Calabria centrale           | 17911013_0120_000 | CFTI4med  | 76   | 75   | 38.636 | 16.268 | 38.636 | 16.268 |  |  |      |  | 6.14 | 6.14 | 0     |  |  |
| 98  | June 07, 1794      | Prealpi Friulane            | 17940607_0045_000 | CFTI4med  | 19   | 19   | 46.306 | 12.821 | 46.306 | 12.821 |  |  |      |  | 5.96 | 5.96 | 0     |  |  |
| 99  | July 28, 1799      | Appennino marchigiano       | 17990728_2205_000 | CFTI4med  | 70   | 67   | 43.193 | 13.152 | 43.2   | 13.146 |  |  | 0.9  |  | 6.18 | 6.18 | 0     |  |  |
| 100 | May 12, 1802       | Valle dell'Oglio            | 18020512_0930_000 | ALBRV010  | 94   | 92   | 45.424 | 9.839  | 45.424 | 9.839  |  |  |      |  | 5.6  | 5.6  | 0     |  |  |
| 101 | July 26, 1805      | Molise                      | 18050726_2100_000 | CFTI4med  | 220  | 214  | 41.5   | 14.474 | 41.5   | 14.474 |  |  |      |  | 6.68 | 6.68 | 0     |  |  |
| 102 | August 26, 1806    | Colli Albani                | 18060826_0735_000 | CFTI4med  | 35   | 35   | 41.718 | 12.725 | 41.718 | 12.725 |  |  |      |  | 5.61 | 5.61 | 0     |  |  |
| 103 | April 02, 1808     | Val Pellice                 | 18080402_1643_000 | CFTI4med  | 105  | 102  | 44.838 | 7.249  | 44.838 | 7.249  |  |  |      |  | 5.64 | 5.64 | 0     |  |  |
| 104 | October 25, 1812   | Pordenonese                 | 18121025_0700_000 | AMGNDT995 | 34   | 32   | 46.027 | 12.589 | 46.027 | 12.589 |  |  |      |  | 5.62 | 5.61 | 0.01  |  |  |
| 105 | September 03, 1815 | Valnerina                   | 18150903_2300_000 | CFTI4med  | 24   | 24   | 42.832 | 13.015 | 42.832 | 13.015 |  |  |      |  | 5.58 | 5.58 | 0     |  |  |
| 106 | February 20, 1818  | Catanese                    | 18180220_1815_000 | CFTI4med  | 128  | 127  | 37.603 | 15.14  | 37.603 | 15.14  |  |  |      |  | 6.28 | 6.28 | 0     |  |  |
| 107 | March 01, 1818     | Monti Iblei                 | 18180301_0245_000 | CFTI4med  | 24   | 22   | 37.204 | 14.756 | 37.226 | 14.729 |  |  | 3.4  |  | 5.57 | 5.56 | 0.01  |  |  |
| 108 | November 22, 1821  | Costa molisana              | 18211122_0115_000 | CAMAL011b | 9    | 9    | 41.975 | 15.214 | 41.975 | 15.214 |  |  |      |  | 5.59 | 5.59 | 0     |  |  |
| 109 | February 01, 1826  | Potentino                   | 18260201_1600_000 | CFTI4med  | 18   | 18   | 40.52  | 15.727 | 40.52  | 15.727 |  |  |      |  | 5.74 | 5.74 | 0     |  |  |
| 110 | October 09, 1828   | Oltrepò Pavese              | 18281009_0220_000 | CFTI4med  | 110  | 109  | 44.821 | 9.047  | 44.821 | 9.047  |  |  |      |  | 5.72 | 5.72 | 0     |  |  |
| 111 | January 02, 1831   | Appennino lucano            | 18310102_1407_000 | PORAL988  | 13   | 13   | 40.082 | 15.786 | 40.082 | 15.786 |  |  |      |  | 5.53 | 5.53 | 0     |  |  |
| 112 | May 26, 1831       | Liguria occidentale         | 18310526_1030_000 | CFTI4med  | 33   | 32   | 43.855 | 7.849  | 43.855 | 7.849  |  |  |      |  | 5.56 | 5.56 | 0     |  |  |
| 113 | January 13, 1832   | Valle Umbra                 | 18320113_1300_000 | CFTI4med  | 101  | 96   | 42.98  | 12.605 | 42.98  | 12.605 |  |  |      |  | 6.43 | 6.42 | 0.01  |  |  |
| 114 | March 08, 1832     | Crotonese                   | 18320308_1830_000 | CFTI4med  | 99   | 98   | 39.079 | 16.919 | 39.079 | 16.919 |  |  |      |  | 6.65 | 6.65 | 0     |  |  |
| 115 | March 13, 1832     | Reggiano                    | 18320313_0330_000 | CFTI4med  | 97   | 97   | 44.765 | 10.494 | 44.765 | 10.494 |  |  |      |  | 5.51 | 5.51 | 0     |  |  |
| 116 | February 14, 1834  | Val di Taro-Lunigiana       | 18340214_1315_000 | CFTI4med  | 112  | 112  | 44.432 | 9.859  | 44.432 | 9.859  |  |  |      |  | 5.96 | 5.96 | 0     |  |  |
| 117 | October 12, 1835   | Cosentino                   | 18351012_2235_000 | CFTI4med  | 36   | 32   | 39.33  | 16.293 | 39.324 | 16.297 |  |  | 0.8  |  | 5.89 | 5.88 | 0.01  |  |  |
| 118 | April 25, 1836     | Calabria settentrionale     | 18360425_0020_000 | CFTI4med  | 44   | 42   | 39.567 | 16.737 | 39.567 | 16.737 |  |  |      |  | 6.18 | 6.18 | 0     |  |  |
| 119 | June 12, 1836      | Asolano                     | 18360612_0230_000 | AMGNDT995 | 26   | 26   | 45.803 | 11.825 | 45.803 | 11.825 |  |  |      |  | 5.53 | 5.53 | 0     |  |  |
| 120 | November 20, 1836  | Appennino lucano            | 18361120_0730_000 | CFTI4med  | 17   | 16   | 40.142 | 15.776 | 40.142 | 15.776 |  |  |      |  | 5.86 | 5.86 | 0     |  |  |
| 121 | April 11, 1837     | Lunigiana                   | 18370411_1700_000 | CFTI4med  | 60   | 58   | 44.175 | 10.182 | 44.21  | 10.184 |  |  | 3.8  |  | 5.94 | 5.74 | 0.2   |  |  |
| 122 | August 14, 1846    | Colline Pisane              | 18460814_1200_000 | CFTI4med  | 121  | 108  | 43.47  | 10.563 | 43.462 | 10.58  |  |  | 1.6  |  | 6.04 | 6.07 | -0.03 |  |  |
| 123 | August 14, 1851    | Vulture                     | 18510814_1320_000 | CFTI4med  | 103  | 103  | 40.96  | 15.669 | 40.96  | 15.669 |  |  |      |  | 6.52 | 6.52 | 0     |  |  |
| 124 | April 09, 1853     | Irpina                      | 18530409_1245_000 | CFTI4med  | 47   | 46   | 40.818 | 15.215 | 40.818 | 15.215 |  |  |      |  | 5.6  | 5.6  | 0     |  |  |
| 125 | February 12, 1854  | Valle Umbra                 | 18540212_0500_000 | CFTI4med  | 21   | 21   | 43.055 | 12.543 | 43.055 | 12.543 |  |  |      |  | 5.57 | 5.57 | 0     |  |  |
| 126 | February 12, 1854  | Cosentino                   | 18540212_1750_000 | CFTI4med  | 89   | 88   | 39.256 | 16.295 | 39.256 | 16.295 |  |  |      |  | 6.34 | 6.34 | 0     |  |  |
| 127 | December 16, 1857  | Basilicata                  | 18571216_2115_001 | CFTI4med  | 340  | 311  | 40.352 | 15.842 | 40.354 | 15.827 |  |  | 1.3  |  | 7.12 | 6.74 | 0.38  |  |  |
| 128 | August 22, 1859    | Valnerina                   | 18590822_0000_000 | AMGNDT995 | 20   | 20   | 42.825 | 13.097 | 42.825 | 13.097 |  |  |      |  | 5.73 | 5.73 | 0     |  |  |
| 129 | October 04, 1870   | Cosentino                   | 18701004_1655_000 | CFTI4med  | 54   | 49   | 39.22  | 16.331 | 39.22  | 16.331 |  |  |      |  | 6.24 | 6.28 | -0.04 |  |  |
| 130 | October 30, 1870   | Forlivese                   | 18701030_1834_000 | CFTI4med  | 41   | 40   | 44.133 | 12.062 | 44.133 | 12.062 |  |  |      |  | 5.61 | 5.61 | 0     |  |  |
| 131 | March 12, 1873     | Appennino marchigiano       | 18730312_2004_000 | CFTI4med  | 196  | 178  | 43.089 | 13.244 | 43.089 | 13.244 |  |  |      |  | 5.85 | 5.83 | 0.02  |  |  |
| 132 | June 29, 1873      | Alpago Cansiglio            | 18730629_0358_000 | CFTI4med  | 197  | 191  | 46.16  | 12.383 | 46.16  | 12.383 |  |  |      |  | 6.29 | 6.29 | 0     |  |  |
| 133 | March 17, 1875     | Costa romagnola             | 18750317_2351_000 | CFTI4med  | 144  | 135  | 44.063 | 12.547 | 44.063 | 12.547 |  |  |      |  | 5.72 | 5.72 | 0     |  |  |
| 134 | December 06, 1875  | Gargano                     | 18751206_0000_000 | MELMO985  | 97   | 87   | 41.689 | 15.677 | 41.689 | 15.677 |  |  |      |  | 5.86 | 5.82 | 0.04  |  |  |
| 135 | February 23, 1879  | Valnerina                   | 18790223_1830_000 | CFTI4med  | 15   | 15   | 42.766 | 13.043 | 42.766 | 13.043 |  |  |      |  | 5.59 | 5.59 | 0     |  |  |
| 136 | March 06, 1886     | Cosentino                   | 18860306_0000_000 | AMGNDT995 | 10   | 10   | 39.338 | 16.191 | 39.338 | 16.191 |  |  |      |  | 5.57 | 5.57 | 0     |  |  |
| 137 | February 23, 1887  | Liguria occidentale         | 18870223_0521_000 | CFTI4med  | 1511 | 1447 | 43.891 | 7.992  | 43.903 | 7.965  |  |  | 2.5  |  | 6.27 | 6.26 | 0.01  |  |  |
| 138 | December 03, 1887  | Calabria settentrionale     | 18871203_0345_000 | CFTI4med  | 142  | 120  | 39.564 | 16.221 | 39.502 | 16.124 |  |  | 10.8 |  | 5.55 | 5.35 | 0.2   |  |  |
| 139 | June 07, 1891      | Valle d'Illasi              | 18910607_0106_000 | CFTI4med  | 403  | 393  | 45.564 | 11.165 | 45.564 | 11.165 |  |  |      |  | 5.87 | 5.88 | -0.01 |  |  |
| 140 | November 16, 1894  | Calabria meridionale        | 18941116_1752_000 | CFTI4med  | 303  | 302  | 38.288 | 15.87  | 38.288 | 15.87  |  |  |      |  | 6.12 | 6.12 | 0     |  |  |
| 141 | May 18, 1895       | Fiorentino                  | 18950518_1955_000 | CFTI4med  | 401  | 388  | 43.703 | 11.264 | 43.703 | 11.264 |  |  |      |  | 5.5  | 5.5  | 0     |  |  |
| 142 | June 27, 1898      | Reatino                     | 18980627_2338_000 | SPAAL985c | 186  | 147  | 42.414 | 12.903 | 42.414 | 12.903 |  |  |      |  | 5.5  | 5.5  | 0     |  |  |
| 143 | February 24, 1904  | Marsica                     | 19040224_1553_000 | CFTI4med  | 56   | 44   | 42.097 | 13.316 | 42.097 | 13.316 |  |  |      |  | 5.71 | 5.71 | 0     |  |  |
| 144 | September 08, 1905 | Calabria centrale           | 19050908_0143_000 | GALMO007  | 895  | 780  | 38.683 | 16.053 | 38.69  | 16.032 |  |  | 2    |  | 6.88 | 6.7  | 0.18  |  |  |
| 145 | October 23, 1907   | Aspromonte                  | 19071023_2028_000 | CFTI4med  | 274  | 270  | 38.086 | 15.985 | 38.086 | 15.985 |  |  |      |  | 5.96 | 5.96 | 0     |  |  |
| 146 | December 28, 1908  | Stretto di Messina          | 19081228_0420_000 | CFTI4med  | 772  | 759  | 38.146 | 15.687 | 38.117 | 15.694 |  |  | 3.3  |  | 7.12 | 7.12 | 0     |  |  |
| 147 | June 07, 1910      | Irpina-Basilicata           | 19100607_0204_000 | CFTI4med  | 376  | 365  | 40.898 | 15.422 | 40.898 | 15.422 |  |  |      |  | 5.7  | 5.7  | 0     |  |  |
| 148 | June 28, 1913      | Calabria settentrionale     | 19130628_0853_000 | CFTI4med  | 151  | 141  | 39.531 | 16.239 | 39.531 | 16.239 |  |  |      |  | 5.67 | 5.67 | 0     |  |  |
| 149 | October 27, 1914   | Lucchesia                   | 19141027_0922_000 | MEAL988   | 660  | 547  | 43.912 | 10.598 | 43.912 | 10.598 |  |  |      |  | 5.56 | 5.51 | 0.05  |  |  |
| 150 | January 13, 1915   | Marsica                     | 19150113_0652_000 | MOLAL999b | 1041 | 969  | 42.014 | 13.531 | 42.016 | 13.584 |  |  | 4.4  |  | 7.11 | 6.93 | 0.18  |  |  |
| 151 | May 17, 1916       | Riminese                    | 19160517_1250_000 | CFTI4med  | 132  | 129  | 44.01  | 12.623 | 44.01  | 12.623 |  |  |      |  | 5.68 | 5.69 | -0.01 |  |  |
| 152 | August 16, 1916    | Riminese                    | 19160816_0706_000 | CFTI4med  | 257  | 253  | 43.961 | 12.671 | 43.961 | 12.671 |  |  |      |  | 5.67 | 5.67 | 0     |  |  |
| 153 | November 16, 1916  | Alto Reatino                | 19161116_0635_000 | SGA002    | 40   | 38   | 42.646 | 13.169 | 42.646 | 13.169 |  |  |      |  | 5.54 | 5.54 | 0     |  |  |
| 154 | April 26, 1917     | Alta Valtiberina            | 19170426_0935_000 | CFTI4med  | 134  | 114  | 43.467 | 12.129 | 43.467 | 12.129 |  |  |      |  | 6.09 | 6.11 | -0.02 |  |  |
| 155 | November 10, 1918  | Appennino forlivese         | 19181110_1512_000 | CFTI4med  | 187  | 184  | 43.917 | 11.933 | 43.917 | 11.933 |  |  |      |  | 6    | 6    | 0     |  |  |
| 156 | June 29, 1919      | Mugello                     | 19190629_1506_000 | CFTI4med  | 565  | 497  | 43.957 | 11.482 | 43.957 | 11.482 |  |  |      |  | 6.43 | 6.43 | 0     |  |  |
| 157 | September 07, 1920 | Garfagnana                  | 19200907_0555_000 | CFTI4med  | 750  | 729  | 44.186 | 10.278 | 44.214 | 10.226 |  |  | 5.2  |  | 6.56 | 6.55 | 0.01  |  |  |
| 158 | March 07, 1928     | Calabria centro-meridionale | 19280307_1055_000 | BARAL980  | 30   | 30   | 38.544 | 16.037 | 38.544 | 16.037 |  |  |      |  | 5.63 | 5.63 | 0     |  |  |
| 159 | March 27, 1928     | Carnia                      | 19280327_0832_000 | BARAL990  | 359  | 337  | 46.372 | 12.975 | 46.372 | 12.975 |  |  |      |  | 5.99 | 6.01 | -0.02 |  |  |
| 160 | July 23, 1930      | Irpina                      | 19300723_0008_000 | GALAL002  | 547  | 513  | 41.068 | 15.318 | 41.083 | 15.26  |  |  | 5.1  |  | 6.69 | 6.69 | 0     |  |  |
| 161 | October 30, 1930   | Senigallia                  | 19301030_0713_000 | MOLMU992  | 268  | 254  | 43.661 | 13.331 | 43.661 | 13.331 |  |  |      |  | 5.75 | 5.75 | 0     |  |  |
| 162 | September 26, 1933 | Maiella                     | 19330926_0333_000 | CFTI4med  | 325  | 318  | 42.079 | 14.093 | 42.079 | 14.093 |  |  |      |  | 6.05 | 6.05 | 0     |  |  |
| 163 | October 18, 1936   | Alpago Cansiglio            | 19361018_0310_000 | BARAL986  | 269  | 264  | 46.089 | 12.38  | 46.089 | 12.38  |  |  |      |  | 6.19 | 6.18 | 0.01  |  |  |
| 164 | October 03, 1943   | Ascolano                    | 194               |           |      |      |        |        |        |        |  |  |      |  |      |      |       |  |  |
